1 Effect of parents' country of birth on the relationship between socioeconomic status and  
2 childhood overweight and obesity in Southwest Sydney, Australia: learnings from the  
3 Growing Healthy Kids population prevalence survey

4 Vilas Kovai <sup>1\*</sup>, Shanley Chong <sup>1</sup>, Janice Tang <sup>1</sup>, Bin Jalaludin <sup>1</sup>, Margaret Thomas <sup>2</sup>, Michelle  
5 Camilleri <sup>1</sup>, Mandy Williams <sup>1</sup>

6 <sup>1</sup> Population Health Service, South West Sydney Local Health District, Liverpool, New  
7 South Wales, Australia

8

9 <sup>2</sup> Prevention Research Collaboration, Sydney School of Public Health, Charles Perkins  
10 Centre, The University of Sydney, New South Wales, Australia

11

12

13

14 \*Corresponding author (VK)

15 E-mail: [Vilas.Kovai@health.nsw.gov.au](mailto:Vilas.Kovai@health.nsw.gov.au)

16

17

18

19

20

21

22

23

24

25

NOTE: This preprint reports new research that has not been certified by peer review and should not be used to guide clinical practice.

## 26 **Abstract**

27 **Background:** Childhood obesity is a major public health concern in Australia and the  
28 multicultural population of South-West Sydney. This study examined the influence of  
29 parents' country of birth (COB) on the association between family socio-economic status  
30 (SES), assessed by area-level disadvantage and annual household income, and childhood  
31 obesity.

32 **Methods:** The analysis of data from the cross-sectional Growing Healthy Kids in Southwest  
33 Sydney (GHK-SWS) baseline survey of 1,815 children aged 5-16 years living in South  
34 Western Sydney, Australia employed generalised linear multinomial mixed models, with  
35 results presented as odds ratio and 95% confidence intervals.

36 **Results:** This study found a significant relationship between SES measures and the risk of  
37 overweight and obesity in the study population. The risks of childhood obesity are greatest in  
38 lower socioeconomic groups (across both SES metrics) regardless of their parents' COB  
39 status. However, the overweight results are inconsistent across SES metrics and COB status.  
40 The risk of being overweight was lower for Australian-born parents living in disadvantaged  
41 areas but higher for those reporting lower income; and higher for Overseas-born parents  
42 living in disadvantaged areas but lower for those reporting low household income.

43 **Conclusion:** Parents' SES is a consistent predictor of childhood obesity, and this relationship  
44 is not modified by parents' COB. However, the likelihood of a child being overweight varied  
45 between the parents' SES measures and COB. Prioritisation of the target population for area-  
46 level preventive public health interventions to modify obesogenic factors is recommended for  
47 a) obese children living in most disadvantaged areas and moderate disadvantaged areas  
48 regardless of their parents' COB; b) overweight and obese children of moderate  
49 disadvantaged areas regardless of their parents' COB.

## 50 **Introduction**

51 Childhood obesity is a global public health issue, with significant health, economic and social  
52 effects. The global prevalence of childhood obesity is high, with substantial adverse  
53 immediate and long-term consequences<sup>1</sup>. A quarter of Australian children are overweight or  
54 obese, with no evidence of a decline in the prevalence<sup>2</sup>.

55 The aetiology of childhood overweight and obesity is multifaceted, involving a complex  
56 interaction between genetic, environmental, cultural, behavioural, and socio-economic  
57 factors<sup>3</sup>. Globally, low socio-economic status (SES) is an important determinant of the  
58 prevalence of childhood obesity<sup>4</sup>. The persistent relationship between low SES and increased  
59 overweight and obesity prevalence has been reported in several studies focusing on  
60 Australian youth<sup>5,6</sup> as well as in children of other high-income countries<sup>7</sup>. Population data in  
61 Australia shows that differences in SES are related to the individual's country of origin<sup>8</sup>,  
62 which is of particular significance in Australia, where approximately a third of the population  
63 is overseas-born or has overseas-born parents<sup>9</sup>.

64 There has been some progress in the investigation of obesogenic factors for children and  
65 other vulnerable populations, but studies are few and the results are inconsistent<sup>10</sup>. Parents'  
66 country of birth (COB) and migration status<sup>11,12</sup>, mothers' perceptions of healthy body  
67 weight<sup>13</sup>, maternal body mass index (BMI)<sup>12</sup>, and a range of SES indicators, including  
68 parents' educational level, household income, place of residence, lifestyle patterns and  
69 employment status<sup>14,15</sup> are important contributing factors to childhood overweight and  
70 obesity.

71 While previous research<sup>8,16</sup> has found that both SES and ethnicity are associated with  
72 childhood obesity in Australian primary school children, less clear is the extent to which

73 parents' COB modifies the relationship between SES (measured by both area-level  
74 disadvantage and individual household income) and childhood overweight or obesity.  
75 The high rates of childhood overweight and obesity in Australia—with one-third of children  
76 living in the South Western Sydney Local Health District (SWSLHD) region of New South  
77 Wales (NSW)<sup>17</sup>—has profound implications for public health policy, specifically concerning  
78 which groups of children should be prioritised for health interventions. The SWSLHD region  
79 has a population of approximately one million, including the largest population of culturally  
80 and linguistically diverse (CALD) communities in NSW, with 36% of residents born  
81 overseas and about 49% of families speaking a language other than English at home<sup>18</sup>. Such  
82 demographic characteristics make this region an ideal location for our study.

83 The objectives of this paper are twofold: a) to investigate the relationship between parents'  
84 SES and childhood overweight and obesity in SWSLHD, and b) to determine whether this  
85 relationship is modified by parents' COB.

86

87

88

89

90

91

92

93

94

## 95 **Methodology**

### 96 **Ethics Approval & Formal Consent**

97 This study was approved by the Human Research Ethics Committee of South Western Sydney  
98 Local Health District (HE18/078). Informed verbal consent was obtained from all the study  
99 participants (i.e., Parents or carers aged  $\geq 18$  years who could provide the maximum  
100 information about the selected child) before the interviews. The data was collected from  
101 October and November 2018. The data was accessed for research purposes from February 2021  
102 and the authors had no access to information that could identify participants during or after  
103 data collection.

### 104 **Questionnaire and Study Sample**

105 We analysed the baseline data from the GHK-SWS study to evaluate the study objectives.  
106 The GHK-SWS baseline study—a cross-sectional population-based survey of parents or  
107 carers of children aged 5-16 years in southwestern Sydney, NSW, Australia—was approved  
108 by the Southwest Sydney Local Health District Human Research Ethics Committee  
109 (HE18/078) and conducted in 2018, with a follow-up study planned to be conducted in 2027.  
110 The main paper from the GHK-SWS study presents a detailed description of the study design  
111 and methodology<sup>19</sup>. In brief, the baseline questionnaire was developed using validated  
112 questions from the 2018 NSW Child Population Health Survey<sup>20</sup>, the NSW Schools Physical  
113 Activity and Nutrition Survey<sup>21</sup> and the Make Healthy Normal campaign evaluation<sup>22</sup>. Survey  
114 domains included: demographics, health status, parental perception of height and weight,  
115 dietary consumption (including fruit and vegetables and discretionary foods), nutrition-  
116 related behaviours, physical activity participation and sedentary activity, as well as several  
117 knowledge and attitudes questions. The questionnaire was translated into Arabic,  
118 Vietnamese, and Cantonese/Mandarin (simplified Chinese) as these are the major language

119 groups in our study area. GHK-SWS study data was collected using a computer-assisted  
120 telephone interview (CATI) system.

121 The target population included all households with children aged 5-16 years within the study  
122 area and the sample frame consisted of residents' landline and mobile telephone numbers.

123 The primary carer (mother or father or grandparents) who could provide maximum  
124 information about the selected child was interviewed from each randomly selected household.  
125 Following the contact, interviewers collected information on the number of eligible children  
126 living in the household and their gender and ages. If the household had more than one eligible  
127 child, then the interviewer randomly selected one of the eligible children using the CATI  
128 system's random number generator.

## 129 **Measures**

### 130 Outcome measure

131 The main outcome measure was the child's BMI. BMI was categorised using the age- and  
132 sex-specific International Obesity Task Force (IOTF) definitions<sup>23</sup>: thin/underweight  
133 ( $BMI < 18 \text{ kg/m}^2$ ), healthy weight ( $18 \text{ kg/m}^2 \leq BMI < 25 \text{ kg/m}^2$ ), overweight ( $25 \leq BMI < 30$   
134  $\text{kg/m}^2$ ) and obese ( $BMI \geq 30 \text{ kg/m}^2$ ). To determine BMI, the respondent was asked two  
135 questions: 1. How tall is <CHILDNAME> without shoes? (in centimetres). 2. How much  
136 does <CHILDNAME> weigh without clothes or shoes? (in kilograms). As the aim of this  
137 paper was on childhood overweight and obesity, children with  $BMI < 18 \text{ kg/m}^2$  were excluded  
138 from the analysis (n=224).

### 139 Predictors of interest

140 The study's main predictor of interest was SES, which was assessed by two measures: area-  
141 level SES and household income of participants. Area-level SES was calculated from the

142 2016 Index of Relative Socio-Economic Disadvantage (IRSED)<sup>24</sup> at the postcode level. The  
143 IRSED was created by the Australian Bureau of Statistics to compare social and economic  
144 disadvantage across geographic areas in Australia. The index is derived from Census  
145 variables such as income, educational attainment, unemployment, and people working in  
146 unskilled occupations. The IRSED was categorised into tertiles (Tertile 1: most  
147 disadvantaged/low SES; Tertile 2: middle disadvantaged/middle SES; and Tertile 3: least  
148 disadvantaged/high SES). The annual household income (before tax) of the respondents was  
149 grouped into four categories: \$0-\$51,999, \$52,000-\$77,999, \$78,000-\$103,999 and \$104,000  
150 or more.

#### 151 Effect Modifier

152 The other variable of interest was the parent's COB (as an effect modifier), which was  
153 grouped into Australian-born and overseas-born. To determine COB, the respondent was  
154 asked – “Can you tell me in which country <CHILDNAME>s mother/father/you was/were  
155 born”? As we only focus on parents (mothers and fathers) as the main carer for the children,  
156 other care relationships (e.g., grandparents or relatives) were excluded from the analysis  
157 (n=51). In this paper, parent refers to mothers (73.5%) and fathers (21.5%) and only their  
158 responses to survey questions were included in the analysis.

159 Socio-demographic variables reported in the survey included both the child's (age and  
160 gender) and parent's demographic characteristics (educational attainment, annual household  
161 income, and rurality of residence using the Accessibility/Remoteness Index of Australia Plus  
162 (ARIA+) index. The rurality of residence quantifies remoteness in terms of the travelling  
163 distance to different-sized population-adjusted service centres<sup>25</sup>. The ARIA+ scores are  
164 classified into five groups: major cities, inner regional, outer regional, remote, and very  
165 remote.

166 Additionally, due to the known relationship between healthy lifestyle behaviours, childhood  
167 BMI and area-level SES<sup>5,26</sup>, three health behaviour factors were explored as potential  
168 mediators: physical activity (PA) levels, sedentary screen time behaviour (SB) and  
169 consumption of sugar-sweetened beverages (SSB). For PA, children were categorised  
170 according to whether they met the current Australian PA guidelines<sup>27</sup> (yes, no) and were  
171 asked the following question: “Over the past 7 days, on how many days was  
172 <CHILDNAME> engaged in moderate to vigorous physical activity for at least 60 minutes  
173 each day (this can be accumulated over the entire day, for example in bouts of 10 minutes)?”  
174 For SB, the current Australian guidelines recommend that children aged 5-17 years limit  
175 sedentary recreational screen time (such as watching TV, iPad, DVDs or on a mobile phone)  
176 to two hours per day<sup>27</sup>. SB was assessed by asking participants: “In a typical week (Monday  
177 to Sunday), how many hours in total does <CHILDNAME> spend watching TV/iPad/DVDs,  
178 using the computer/iPad/mobile phone for fun or playing video games?” and categorised into  
179 <2 hours of screening time per day and >2 hours of screening per day. SSB consumption was  
180 assessed by asking participants” How many cups of soft drink/cordial/sport drink/energy  
181 drink, does their child usually drink in a day? Total consumption of SSB per day was  
182 categorised into no cups, ≤1 cup, and >1 cup per day. The current Australian Dietary  
183 Guidelines discourage the consumption of any SSBs in children due to the numerous  
184 detrimental health effects<sup>28</sup>.

## 185 **Data analysis**

186 A directed acyclic graph (DAG) was used to identify potential confounders, mediators, and  
187 effect modifiers in the relationship between SES and children’s overweight and obesity  
188 (Figure 1). Following a comprehensive descriptive analysis, the R package “mma” was used  
189 to conduct multiple mediation analysis<sup>29</sup>. Multiple mediation analysis examined the presence  
190 of the potential mediator factors: meeting PA, SB and SSB consumption guidelines. The



191 algorithms for the estimation of indirect effects were repeated 50 times with 500 times of  
192 bootstrap resampling. These three health behaviours were not significant mediators for  
193 children's overweight and obesity and were included as confounders in the final model.  
194 Proc GLIMMIX procedure in SAS v9.4 was then used to conduct generalised linear  
195 multinomial mixed models<sup>29</sup>. This included random intercepts, which accounted for Local  
196 Government Area (LGA) clustering effects, to determine associations between area-level  
197 SES and Children's overweight and obesity. Children's age, gender, parent's relationship to  
198 child (as mother or father), parent's educational attainment, annual household income, and  
199 rurality of residence were included as confounders in the final model. Effect modification by  
200 the main carer's (mother or father) COB was tested and was statistically significant  
201 ( $p < 0.0001$ ).

202 Results from the multinomial multilevel regression model are presented as odds ratio (ORs)  
203 and associated 95% confidence intervals (95% CIs). Survey weighting was used in all  
204 analyses to ensure the survey sample was representative of all children living in SWSLHD.

205 Figure 1: Directed acyclic graph of the relationship between socioeconomic status and body  
206 mass index.

207

208

209

210

211

212

213

214

215

216

217

## 218 **Results**

219 The socio-demographic characteristics of participants are presented in Table 1. In total, the  
220 GHK-SWS study collected data from 1,815 children. After exclusion of thin (underweight)  
221 children (n=224) and other non-parents (n=51), the study findings are from the analysis of  
222 1,535 children. Overall, 57% of children were within the healthy weight range (n=878), 23%  
223 were overweight (n=367), and 20% were obese (n=290). About half of the participants were  
224 boys (51%, n=790) and the mean age was 10.8 years (SD=4.5 years). The majority lived in  
225 major cities (92%), with more than half of the participants (57%) living in more  
226 disadvantaged areas and about one-third (34%) reporting an annual household income of less  
227 than \$52,000. Most participating parents were mothers (74%), about half of whom were born  
228 in Australia (51%), 35% have completed a university degree, 32% with a Technical and  
229 Further Education (TAFE) diploma, and 33% with  $\leq 12$  years of school education.

230 Table 1 : Participants sociodemographic characteristics, n=1535

231

| Variable                                      | Level       | n, %       |
|-----------------------------------------------|-------------|------------|
| <b>Age</b>                                    | 5-11 years  | 890, 58.0  |
|                                               | 12-16 years | 645, 42.0  |
| <b>Gender</b>                                 | Boys        | 790, 51.2  |
|                                               | Girls       | 745, 48.8  |
| <b>Parent's relationship</b>                  | Mother      | 1096, 73.5 |
|                                               | Father      | 439, 26.5  |
| <b>Parent's country of birth (missing=45)</b> | Australia   | 780, 50.7  |
|                                               | Other       | 755, 49.3  |

|                                                           |                         |            |
|-----------------------------------------------------------|-------------------------|------------|
| <b>Parent's educational attainment (missing=7)</b>        | <=Year 12               | 430, 33.1  |
|                                                           | Trade, TAFE, or Diploma | 523, 32.0  |
|                                                           | University degree       | 575, 34.9  |
| <b>Annual household Income (before tax) (missing=232)</b> | \$0-\$51,999            | 354, 34.2  |
|                                                           | \$52,000-\$77,999       | 254, 20.5  |
|                                                           | \$78,000-\$103,999      | 250, 16.3  |
|                                                           | \$104,000 or more       | 445, 28.9  |
| <b>Location</b>                                           | Major Cities            | 1404, 91.7 |
|                                                           | Inner Regional          | 131, 8.3   |
| <b>Area-Level socio-economic status</b>                   | Most disadvantaged      | 843, 57.0  |
|                                                           | Moderate disadvantaged  | 263, 16.6  |
|                                                           | Least disadvantaged     | 429, 26.4  |
| <b>Body mass index</b>                                    | Healthy weight          | 878, 57.2  |
|                                                           | Overweight              | 367, 22.5  |
|                                                           | Obese                   | 290, 20.3  |
| <b>Met physical activity guideline</b>                    | No                      | 1212, 77.7 |
|                                                           | Yes                     | 323, 22.3  |
| <b>Met sedentary behaviour guideline (missing=17)</b>     | No                      | 349, 22.2  |
|                                                           | Yes                     | 1169, 77.8 |
| <b>Sugar sweetened beverages (per day)</b>                | No cups                 | 786, 52.4  |
|                                                           | 1 cup                   | 510, 32.4  |
|                                                           | 2+ cups                 | 239, 15.2  |

232 TAFE: Technical and Further Education

233

## 234 **Socio-demographic factors and BMI**

235 In an adjusted model, using healthy weight as the reference, the socio-demographic factors

236 associated with higher odds of being overweight in children were: girls, aged 5-11 years,

237 parents born in Australia, parents who had only completed year 12 or less of education,

238 families with a reported annual household income less than \$77,999, living in a major city

239 and a moderate disadvantaged area (Table 2). Children were more likely to be obese if they

240 were: boys, aged 5-11 years, their fathers were the main carers, parents were born overseas,

241 parents who had not completed a university degree, from families with a reported annual

242 household income of less than \$52,000, living in inner regional areas, and from the most  
 243 disadvantaged areas. (Table 2).

244

245

246 Table 2: Adjusted associations between socio-demographic factors, health behaviours and  
 247 overweight and obesity\*

| Variable                               | Level                   | Healthy weight | Overweight   |                     | Obese        |                     |
|----------------------------------------|-------------------------|----------------|--------------|---------------------|--------------|---------------------|
|                                        |                         | n, %           | n, %         | Adjusted OR, 95% CI | n, %         | Adjusted OR, 95% CI |
| <b>Age</b>                             | 5-11 years              | 483,<br>53.0   | 191,<br>20.6 | 1                   | 216,<br>26.4 | 1                   |
|                                        | 12-16 years             | 395,<br>63.0   | 176,<br>25.1 | 0.83,<br>0.81-0.86  | 74,<br>11.9  | 0.28,<br>0.27-0.29  |
| <b>Gender</b>                          | Boys                    | 435,<br>55.6   | 201,<br>22.4 | 0.98,<br>0.95-1     | 154,<br>22.0 | 1.04,<br>1.01-1.07  |
|                                        | Girls                   | 443,<br>58.9   | 166,<br>22.6 | 1                   | 136,<br>18.5 | 1                   |
| <b>Parent's relationship</b>           | Mothers                 | 643,<br>47.8   | 254,<br>22.4 | 1                   | 199,<br>19.9 | 1                   |
|                                        | Fathers                 | 235,<br>55.6   | 113,<br>22.8 | 0.99,<br>0.96-1.02  | 91,<br>21.5  | 1.18,<br>1.14-1.22  |
| <b>Parent's country of birth</b>       | Australia               | 466,<br>60.1   | 185,<br>22.5 | 1                   | 129,<br>17.4 | 1                   |
|                                        | Other                   | 412,<br>54.2   | 182,<br>22.4 | 0.88,<br>0.85-0.91  | 161,<br>23.3 | 1.43,<br>1.38-1.48  |
| <b>Parent's educational attainment</b> | <=Year 12               | 219,<br>51.3   | 112,<br>23.4 | 1.1,<br>1.06-1.14   | 99,<br>25.3  | 1.99,<br>1.91-2.08  |
|                                        | Trade, TAFE, or Diploma | 305,<br>57.8   | 116,<br>21.5 | 1.02,<br>0.99-1.06  | 102,<br>21.0 | 1.49,<br>1.43-1.55  |
|                                        | University degree       | 351,<br>62.9   | 138,<br>22.4 | 1                   | 86,<br>14.8  | 1                   |
| <b>Annual household Income</b>         | \$0-\$51,999            | 175,<br>46.6   | 86,<br>22.8  | 1.3,<br>1.24-1.35   | 93,<br>30.6  | 1.66,<br>1.59-1.74  |
|                                        | \$52,000-\$77,999       | 146,<br>60.0   | 58,<br>22.9  | 1.09,<br>1.05-1.14  | 50,<br>17.2  | 0.92,<br>0.88-0.97  |
|                                        | \$78,000-\$103,999      | 145,<br>61.4   | 62,<br>22.4  | 1,<br>0.95-1.05     | 43,<br>16.2  | 0.93,<br>0.88-0.98  |
|                                        | \$104,000 or more       | 271,<br>62.9   | 108,<br>21.3 | 1                   | 66,<br>15.8  | 1                   |
| <b>Location</b>                        | Major Cities            | 800,<br>56.5   | 338,<br>22.9 | 1                   | 266,<br>20.6 | 1                   |
|                                        | Inner Regional          | 78,<br>65.1    | 29,<br>17.6  | 0.68,<br>0.62-0.75  | 24,<br>17.3  | 3.11,<br>2.83-3.43  |

|                                            |                      |              |              |                     |              |                     |
|--------------------------------------------|----------------------|--------------|--------------|---------------------|--------------|---------------------|
| <b>Area-level SES</b>                      | Most disadvantaged   | 454,<br>53.6 | 209,<br>22.6 | 0.95, 0.91-<br>0.99 | 180,<br>23.8 | 1.49, 1.42-<br>1.57 |
|                                            | Middle disadvantaged | 147,<br>56.5 | 67,<br>23.8  | 1.27,<br>1.21-1.34  | 49,<br>19.6  | 1.74,<br>1.63-1.84  |
|                                            | Least disadvantaged  | 277,<br>65.4 | 91,<br>21.5  | 1                   | 61,<br>13.1  | 1                   |
| <b>Met physical activity guideline</b>     | No                   | 686,<br>56.4 | 301,<br>24.3 | 1.42,<br>1.36-1.47  | 225,<br>19.4 | 0.92,<br>0.89-0.96  |
|                                            | Yes                  | 192,<br>60.1 | 66,<br>16.4  | 1                   | 65,<br>23.5  | 1                   |
| <b>Met sedentary behaviour guideline</b>   | No                   | 181,<br>51.2 | 95,<br>24.5  | 1.13,<br>1.09-1.17  | 73,<br>24.4  | 1.49,<br>1.44-1.55  |
|                                            | Yes                  | 686,<br>58.7 | 270,<br>22.2 | 1                   | 213,<br>19.1 | 1                   |
| <b>Sugar sweetened beverages (per day)</b> | No cups              | 481,<br>60.3 | 171,<br>21.6 | 1                   | 134,<br>18.1 | 1                   |
|                                            | >0-<1 cup            | 287,<br>58.6 | 124,<br>22.2 | 1.22,<br>1.18-1.26  | 99,<br>19.2  | 1.37,<br>1.32-1.42  |
|                                            | 1+ cups              | 110,<br>43.5 | 72,<br>26.2  | 1.52,<br>1.45-1.59  | 57,<br>30.3  | 2.52,<br>2.42-2.63  |

248 \*Type 3, p-value for each variable is <.0001

249 SES= Socio Economic Status

250

## 251 **Health Behaviours and BMI**

252 In the same adjusted model (Table 2), children are more likely to be overweight when PA and  
 253 SSB guidelines are not met. Similar patterns were observed for children with higher odds of  
 254 being obese except for meeting PA guidelines: children who meet PA guidelines are more  
 255 likely to be obese (OR=1.09, 95 % CI=1.04-1.12) compared to all other children.

## 256 **SES and BMI by Parents' COB**

257 Figure 2 shows the associations between area-level SES, annual gross household income and  
 258 child overweight and obesity by parents' COB after adjusting for confounders.

259

260

261

262

263

264

265  
266  
267  
268  
269  
270  
271  
272

## **Overweight and obesity in children with parents born in Australia**

273 If parents were born in Australia, the odds of their child being overweight were highest for  
274 families living in moderate disadvantaged areas (OR=1.36, 95% CI=1.27-1.46) but lowest for  
275 families living in the most disadvantaged areas (OR=0.78, 95% CI=0.74-0.83), compared to  
276 those living in the least disadvantaged areas. Compared to an annual household income of  
277 \$104,000 or more, an annual household income below \$77,999 was associated with a higher  
278 risk for overweight (\$0-\$51,999: OR=1.88, 95% CI=1.78-2.00; \$52,000-\$77,999: OR=1.77,  
279 95% CI=1.67-1.88), while an annual household income of \$78,000-\$103,999 was associated  
280 with a lower risk (OR=0.78, 95% CI=0.73-0.83).

281 The risk of a child being obese was higher among participants living in the most and  
282 moderately disadvantaged areas (most disadvantaged areas: OR=1.83, 95% CI=1.70-1.97;  
283 moderate disadvantaged areas: OR=2.38, 95% CI=2.19-2.58) than living in the least  
284 disadvantaged areas. The odds of being obese were also higher for all three annual household  
285 income categories compared to the reference category of >\$104,000: (\$0-\$51,999: OR=3.28,  
286 95% CI=3.06-3.52; \$52,000-\$77,999: OR=1.53, 95% CI=1.41-1.66; \$78,000-\$103,999  
287 OR=1.60, 95% CI=1.49-1.72).

## **Overweight and obesity in children with parents born overseas**

289 About parents born overseas, the odds of their children being overweight were higher for  
290 families living in the most disadvantaged areas (OR=1.19, 95% CI=1.10-1.29), and moderate  
291 disadvantaged areas (OR=1.42, 95% CI=1.29-1.57). The odds of children being overweight

292 were lower among families reporting an annual household income below \$77,999 than those  
293 above \$104,000 or more (\$0-\$51,999: OR=0.81, 95% CI=0.76-0.87; \$52,000-\$77,999:  
294 OR=0.62, 95% CI=0.58-0.67). However, the odds of children being overweight were higher  
295 among families with a household annual income of \$78,000-\$103,999 (OR=1.23, 95%  
296 CI=1.14-1.32).

297 As area-level SES increased, the odds of these children being obese followed a clearly  
298 increasing trend from least disadvantaged to most disadvantaged (moderate disadvantaged  
299 areas: OR=1.22, 95% CI=1.11-1.34; most disadvantaged areas: OR=1.57, 95% CI=1.45-  
300 1.70).

301 The odds of children being obese were higher among families with a reported annual  
302 household income of \$0-\$51,999 (OR=1.12, 95% CI=1.05-1.20), though to a much lesser  
303 extent than children whose parents were born in Australia. However, the odds of children  
304 being obese were lower among participants whose annual household income was between  
305 \$52,000 and \$103,999 (\$52,000-\$77,999: OR=0.75, 95% CI=0.70-0.80; \$78,000-\$103,999:  
306 OR=0.51, 95% CI=0.47-0.56).

307

308

309

310

311

312

313

314

315

316

## 317 **Discussion**

318 This study found a significant relationship between SES measures (assessed by area-level  
319 disadvantage and annual household income) and the risk of overweight and obesity among  
320 children aged 5-16 years living in Southwest Sydney. The obesity results are consistent  
321 across SES metrics and COB groups. A higher risk for childhood obesity was found for  
322 children in low SES households regardless of whether SES status was measured by  
323 household income or area of residence and this relationship held whether the responding  
324 parent was born in Australia or outside Australia. Childhood obesity risk was three-fold  
325 higher for Australian-born parents with the lowest household income level.

326 The overweight results, however, are inconsistent across SES metrics and COB groups.  
327 Children of Australian-born parents had a lower risk of being overweight if they lived in low-  
328 SES areas, but children of overseas-born parents had a higher risk of being overweight if they  
329 lived in low-SES areas. When SES was measured by annual household income, the opposite  
330 was found. Children of Australian-born parents with low annual household incomes had a  
331 higher risk of being overweight whereas children of overseas-born parents with low annual  
332 household incomes had a lower risk of being overweight.

333 The increased risk of obesity in children of low SES groups across both Australian and  
334 overseas-born parents in our study accords with the recent World Health Organization  
335 (WHO) report on ending childhood obesity<sup>30</sup>. The existing evidence from WHO and recent  
336 evidence from Australia demonstrates that the risks of childhood obesity are highest in lower



337 SES groups living in high-income countries<sup>31,32</sup>. Indeed, in high-income countries, children  
338 from low SES population groups such as immigrants, indigenous, and culturally and  
339 linguistically diverse groups, are at a particularly high risk of developing obesity<sup>30</sup>.

340 While many studies have examined the contribution of SES to differences in obesity by  
341 ethnic group, very few studies have considered migration status as a factor<sup>33</sup>. The limited  
342 evidence from studies conducted in Europe<sup>34</sup>, USA<sup>35</sup>, Australia<sup>36</sup> and Germany<sup>37</sup> suggests  
343 that weight increases substantially among migrant children over a post-migration period of 10  
344 to 15 years and social and economic disadvantage of migrants is linked to an increased risk of  
345 childhood obesity, an association our study findings confirm.

346 In this study, the influence of SES as measured by both area and household income metrics  
347 on childhood overweight and obesity was inconsistent across the two SES measures. SES  
348 measured by household income and area-level disadvantage provide different contextual  
349 information. Further, the risk of childhood overweight and SES is also influenced by the type  
350 of SES measure used in the analysis. For example, children of immigrants with low SES were  
351 at higher risk of being overweight when parental education was used as a proxy for SES<sup>37</sup> but  
352 not when employment was used as an indicator of SES<sup>38</sup>. Area-level SES also reflects other  
353 area-level characteristics such as access to healthy foods and facilities for physical activity,  
354 employment opportunities, and crime levels. Therefore, while household income is an  
355 important SES metric, area-level SES may be a more useful measure when policy decisions  
356 must be made to allocate resources or to implement population-level programs. The results  
357 from our study and the literature indicate the need for further detailed studies to understand  
358 the complexity and variation of childhood overweight and obesity in subgroups of the  
359 population.

360 While household income is a known predictor of childhood obesity, this association was  
361 significantly modified by parents' country of birth. A systematic review of socioeconomic  
362 inequalities in childhood obesity in the United Kingdom, for example, found that while  
363 household income can reliably be ascribed as a determinant of childhood obesity, such  
364 findings were not consistent across all studies<sup>39</sup>. Our study also confirms that low household  
365 income is a reliable predictor of childhood obesity, regardless of children's COB status. Still,  
366 when it comes to the question of being overweight, parents' COB is a modifying factor.  
367 Future studies would benefit from the inclusion of both area- and individual-level SES  
368 metrics to explore their value in predicting childhood overweight and obesity.

369 Childhood overweight and obesity arise from exposure of the child to an obesogenic  
370 environment and insufficient responses to that environment. Such responses vary from person  
371 to person for reasons that may be social, cultural, economic, environmental, or behavioural,  
372 as discussed below.

373 There are plausible explanations for the increased risk of childhood overweight and/or  
374 obesity in the children of overseas-born parents living in disadvantaged neighbourhoods.  
375 Residents of disadvantaged areas are more likely to be living with low wages, unemployment  
376 or, uncertain employment, particularly if they are recent migrants, females, single parents  
377 with dependent children, or speak a language other than English at home<sup>40,41</sup>. Subsequent  
378 generations of migrants, even those with higher income levels, are also more likely to  
379 experience marginalisation and reduced opportunity<sup>42</sup>, attain lower educational levels, and  
380 lack the resources to own property<sup>43</sup>. Moreover, while migrants may arrive in their new  
381 country with certain health advantages, they are more likely to experience social isolation or  
382 marginalisation, stress, and weight gain 10-15 years after migration<sup>33</sup>.

383 Besides the socioeconomic disadvantage of migrants, their exposure to obesogenic  
384 environmental factors in host countries may also influence the higher prevalence of  
385 overweight/obesity among their children<sup>44,45</sup>. This phenomenon has been linked to the  
386 challenges of acculturation, including lifestyle changes in the host country, lower levels of  
387 physical activity, increased sedentary lifestyle<sup>18,34</sup> and the adoption of unhealthy diets<sup>45-47</sup>.

388

### 389 **Strengths and Limitations**

390 BMI based on self-reported height and weight may cause moderate measurement bias.  
391 However, evidence from a previous study suggests that correlations between self-reported  
392 height, weight and BMI values and objectively measured values remained high and hence  
393 support the use of self-reported values<sup>48</sup>. While the study provides comprehensive  
394 information based on sufficient sample size, representative population data and a standardised  
395 questionnaire, a potential limitation is the assessment of the causal association between SES,  
396 parents' country of birth and childhood overweight and obesity, because of its cross-sectional  
397 design. While children's health behaviours, such as meeting physical activity, sedentary  
398 behaviour, and sugar-sweetened beverage consumption guidelines, were adjusted in the final  
399 model, future studies that include data on other obesogenic factors (such as the availability of  
400 unhealthy food stores) would be an important area of research.

### 401 **Conclusion**

402 Parents' SES (measured by area level and household income) is a consistent predictor of  
403 childhood obesity, and this relationship is not modified by parents' COB. However, the  
404 likelihood of being overweight varied between the SES measures and parents' COB. It is  
405 recommended that the priority populations that should be targeted for preventive public  
406 health interventions to modify obesogenic factors include a) obese children living in most

407 disadvantaged regardless of their parents' COB; b) overweight and obese children of  
408 moderate disadvantaged areas regardless of their parents' COB.  
409 Identifying the causes underlying the prevalence of overweight in children from different  
410 COB backgrounds can provide further insight into the development of effective and relevant  
411 policies and health promotion initiatives. As both area-level and household-level SES metrics  
412 are associated with childhood obesity but inconsistently, therefore, future studies should  
413 include both metrics when exploring associations with childhood obesity.

#### 414 **Acknowledgements**

415 We firstly acknowledge the parents and carers of children living in the South West Sydney  
416 Local Health District who generously gave their time to complete the GHK-SWS Survey. We  
417 acknowledge the contribution of McNair Yellow Squares who were contracted by the  
418 University of Sydney to undertake the survey. We also acknowledge the Growing Healthy  
419 Kids Evaluation Advisory Group which contributed to the development of the survey and  
420 analysis of the data. Dr Phil Hughes of Engine Group provided the data weighting. We would  
421 like to also thank Francis Fox for his language edits.

#### 422 **Financial Disclosure**

423 We also acknowledge that the GHK study was funded by the New South Wales (NSW)  
424 Ministry of Health, Australia. The funders had no role in study design, data collection and  
425 analysis, decision to publish, or preparation of manuscript.

#### 426 **Declaration of Competing Interest**

427 The authors have declared that no competing interests exist.

#### 428 **Authors' contributions**

429 VK wrote the manuscript and was responsible for the design, drafting, interpretation of data,  
430 reviewing and revisions of the manuscript. SC contributed to the design, conducted analysis  
431 of data, wrote the results section, reviewing and revisions of the manuscript. BJ contributed  
432 to the design, methodology, results and extensive reviewing, and revisions of the manuscript  
433 and oversaw the data analysis and interpretation. JT, MC, MT, and MW contributed to the  
434 revisions of the manuscript. All authors read and approved the final manuscript.

435

436

437

438

439

440  
441  
442  
443  
444  
445  
446

## 447 References

- 448 1. Afshin A, Forouzanfar MH, Reitsma MB, et al. Health Effects of Overweight and Obesity in  
449 195 Countries over 25 Years. *N Engl J Med*. 2017;377(1):13-27.
- 450 2. Australian Bureau of Census. National Health Survey: Key findings for health statistics  
451 including long-term health conditions; mental wellbeing; and health risk factors for 2017-18.  
452 Accessed on 29.06.21 from [https://www.abs.gov.au/statistics/health/health-conditions-and-](https://www.abs.gov.au/statistics/health/health-conditions-and-risks/national-health-survey-first-results/latest-release)  
453 [risks/national-health-survey-first-results/latest-release](https://www.abs.gov.au/statistics/health/health-conditions-and-risks/national-health-survey-first-results/latest-release) 2018.
- 454 3. Han JC, Lawlor DA, Kimm SY. Childhood obesity. *Lancet*. 2010;375(9727):1737-1748.
- 455 4. Chung A, Backholer K, Wong E, Palermo C, Keating C, Peeters A. Trends in child and  
456 adolescent obesity prevalence in economically advanced countries according to  
457 socioeconomic position: a systematic review. *Obesity reviews : an official journal of the*  
458 *International Association for the Study of Obesity*. 2016;17(3):276-295.
- 459 5. Hardy LL, Mhrshahi, S., Gale, J., Drayton, B. A., Bauman, A., & Mitchell, J.,. 30-year trends in  
460 overweight, obesity and waist-to-height ratio by socioeconomic status in Australian children,  
461 1985 to 2015. (2005), 41(1), 76–82. <https://doi.org/10.1038/ijo.2016.204>. *Int J Obesity*.  
462 2017.
- 463 6. O'Dea JA, Dibley MJ. Obesity increase among low SES Australian schoolchildren between  
464 2000 and 2006: time for preventive interventions to target children from low income  
465 schools? *International journal of public health*. 2010;55(3):185-192.
- 466 7. Stamatakis E, Wardle J, Cole TJ. Childhood obesity and overweight prevalence trends in  
467 England: evidence for growing socioeconomic disparities. *Int J Obes (Lond)*. 2010;34(1):41-  
468 47.
- 469 8. Achat HM, Stubbs JM. Socio-economic and ethnic differences in the prevalence of  
470 overweight and obesity among school children. *J Paediatr Child Health*. 2014;50(10):E77-84.
- 471 9. ABS. "Australian Bureau of Statistics." 2016 Census. Retrieved 10 May, 2020, from  
472 <https://www.abs.gov.au/websitedbs/censushome.nsf/home/2016>. 2016.
- 473 10. Dondi A, Piccinno V, Morigi F, Sureshkumar S, Gori D, Lanari M. Food Insecurity and Major  
474 Diet-Related Morbidities in Migrating Children: A Systematic Review. *Nutrients*. 2020;12(2).
- 475 11. Besharat Pour M, Bergström A, Bottai M, et al. Effect of parental migration background on  
476 childhood nutrition, physical activity, and body mass index. *Journal of obesity*.  
477 2014;2014:406529.
- 478 12. Jiménez-Cruz A, Wojcicki JM, Bacardí-Gascón M, et al. Maternal BMI and migration status as  
479 predictors of childhood obesity in Mexico. *Nutr Hosp*. 2011;26(1):187-193.
- 480 13. Natale R, Uhlhorn SB, Lopez-Mitnik G, et al. Caregiver's Country of Birth Is a Significant  
481 Determinant of Accurate Perception of Preschool-Age Children's Weight. *Health Educ Behav*.  
482 2016;43(2):191-200.
- 483 14. Ahmad A, Zulaily N, Shahril MR, Syed Abdullah EFH, Ahmed A. Association between  
484 socioeconomic status and obesity among 12-year-old Malaysian adolescents. *PloS one*.  
485 2018;13(7):e0200577.

- 486 15. Wu S, Ding Y, Wu F, et al. Socio-economic position as an intervention against overweight and  
487 obesity in children: a systematic review and meta-analysis. *Scientific reports*. 2015;5:11354.
- 488 16. Hardy LL, King L, Hector D, Baur LA. Socio-cultural differences in Australian primary school  
489 children's weight and weight-related behaviours. *J Paediatr Child Health*. 2013;49(8):641-  
490 648.
- 491 17. Owen K CC, Thomas M. Growing Healthy Kids in South West Sydney: Results of the 2018  
492 Baseline Population Health Survey. Final Report. Prepared for the South West Sydney Local  
493 Health District and NSW Ministry of Health. Physical Activity Nutrition Obesity Research  
494 Group, Prevention Research Collaboration, Sydney School of Public Health, The University of  
495 Sydney, Sydney,. 2021.
- 496 18. NSW Health and South Western Sydney Local Health District. Growing Healthy Kids in South  
497 West Sydney: SWSLHD Childhood Overweight and Obesity Prevention and Management  
498 Action Plan (2017 - 2025). . In:2017.
- 499 19. Margaret Thomas and Michelle Camilleri (joint lead), Shanley Chong, Vilas Kovai, Mandy  
500 Williams, Bin Jalaludin, Conaty S. A cross-sectional baseline study of childhood overweight  
501 and obesity in a multicultural and disadvantaged Australian population: The 'Growing  
502 Healthy Kids in South West Sydney' 2023. In. Sydney: SWSLHD-Population Health, NSW  
503 Health; 2023 [Manuscript Submitted for Publication].
- 504 20. NSW Government. NSW Population Health Survey, 2018 Questionnaire. Accessed on  
505 29.06.21 from [https://www.health.nsw.gov.au/surveys/adult/Documents/questionnaire-  
506 2018.pdf](https://www.health.nsw.gov.au/surveys/adult/Documents/questionnaire-2018.pdf). 2018.
- 507 21. Hardy LL MS, Drayton BA, Bauman, A,. NSW Schools Physical Activity and Nutrition Survey  
508 (SPANS) 2015: Full Report. 2016 Sydney: NSW Department of Health. Accessed on 29.06.21  
509 from <https://www.health.nsw.gov.au/heal/Publications/spans-2015-full-report.PDF>. 2015.
- 510 22. NSW Health. Make Healthy Normal Phase 2 – Families Campaign Baseline Survey (version  
511 10). In: Kovai V, ed2017.
- 512 23. Cole TJ, Lobstein T. Extended international (IOTF) body mass index cut-offs for thinness,  
513 overweight and obesity. *Pediatr Obes*. 2012;7(4):284-294.
- 514 24. ABS. Census of Population and Housing: Socio-Economic Indexes for Areas, Australia, 2016.  
515 (Canberra, 2018). 2016.
- 516 25. Australian Institute of Health and Welfare (AIHW). Rural, regional and remote health: a  
517 guide to remoteness classifications. Canberra: AIHW. 2004.
- 518 26. Williams AS, Ge B, Petroski G, Kruse RL, McElroy JA, Koopman RJ. Socioeconomic Status and  
519 Other Factors Associated with Childhood Obesity. *Journal of the American Board of Family  
520 Medicine : JABFM*. 2018;31(4):514-521.
- 521 27. Australian Government - Department of Health and Aged Care. Physical Activity and  
522 Sedentary Guidelines For children and young people (5 to 17 years). Accessed on 06.03.2024  
523 [https://www.health.gov.au/topics/physical-activity-and-exercise/physical-activity-and-  
524 exercise-guidelines-for-all-australians/for-children-and-young-people-5-to-17-years](https://www.health.gov.au/topics/physical-activity-and-exercise/physical-activity-and-exercise-guidelines-for-all-australians/for-children-and-young-people-5-to-17-years). 2021.
- 525 28. Australian Government, National Health and Medical Research Council, Department of  
526 Health and Ageing. Australian Dietary Guidelines: Providing the scientific evidence for  
527 healthier Australian diets.  
528 [https://www.eatforhealth.gov.au/sites/default/files/files/the\\_guidelines/n55\\_Australian\\_di  
529 etary\\_guidelines.pdf](https://www.eatforhealth.gov.au/sites/default/files/files/the_guidelines/n55_Australian_dietary_guidelines.pdf). 2013.
- 530 29. SAS Institute Inc. SAS/ACCESS® 9.4 Interface to ADABAS: Reference. Cary, NC: SAS Institute  
531 Inc. 2013.
- 532 30. World Health Organization. *Report of the commission on ending childhood obesity*. Geneva,  
533 Switzerland 21 January 2016 2016.
- 534 31. Due P, Damsgaard MT, Rasmussen M, et al. Socioeconomic position, macroeconomic  
535 environment and overweight among adolescents in 35 countries. *Int J Obes (Lond)*.  
536 2009;33(10):1084-1093.

- 537 32. Keramat SA, Alam K, Gow J, Biddle SJH. Impact of Disadvantaged Neighborhoods and  
538 Lifestyle Factors on Adult Obesity: Evidence From a 5-Year Cohort Study in Australia. *Am J*  
539 *Health Promot.* 2021;35(1):28-37.
- 540 33. Murphy M, Robertson W, Oyebode O. Obesity in International Migrant Populations. *Curr*  
541 *Obes Rep.* 2017;6(3):314-323.
- 542 34. Labree LJ, van de Mheen H, Rutten FF, Foets M. Differences in overweight and obesity  
543 among children from migrant and native origin: a systematic review of the European  
544 literature. *Obesity reviews : an official journal of the International Association for the Study*  
545 *of Obesity.* 2011;12(5):e535-547.
- 546 35. Tsujimoto T, Kajio H, Sugiyama T. Obesity, diabetes, and length of time in the United States:  
547 Analysis of National Health and Nutrition Examination Survey 1999 to 2012. *Medicine*  
548 *(Baltimore).* 2016;95(35):e4578.
- 549 36. Delavari M, Farrelly A, Renzaho A, Mellor D, Swinburn B. Experiences of migration and the  
550 determinants of obesity among recent Iranian immigrants in Victoria, Australia. *Ethn Health.*  
551 2013;18(1):66-82.
- 552 37. Nagel G, Wabitsch M, Galm C, et al. Determinants of obesity in the Ulm Research on  
553 Metabolism, Exercise and Lifestyle in Children (URMEL-ICE). *Eur J Pediatr.*  
554 2009;168(10):1259-1267.
- 555 38. Wang Y, Lim H. The global childhood obesity epidemic and the association between socio-  
556 economic status and childhood obesity. *Int Rev Psychiatry.* 2012;24(3):176-188.
- 557 39. El-Sayed AM, Scarborough P, Galea S. Socioeconomic inequalities in childhood obesity in the  
558 United Kingdom: a systematic review of the literature. *Obes Facts.* 2012;5(5):671-692.
- 559 40. Yogi Vidyattama, Robert Tanton, and NSW Council of Social Service (NCOSS). Mapping  
560 Significant Economic Disadvantage in New South Wales, NATSEM, Institute for Governance  
561 and Policy Analysis (IGPA), University of Canberra. Report commissioned by NCOSS.  
562 <https://nla.gov.au/nla.obj-2040465540/view>. 2019.
- 563 41. Massey SJL, Parr N. The socio-economic status of migrant populations in regional and rural  
564 Australia and its implications for future population policy. *Journal of Population Research.*  
565 2012;29(1):1-21.
- 566 42. Park J, Myers D. Intergenerational mobility in the post-1965 immigration era: estimates by  
567 an immigrant generation cohort method. *Demography.* 2010;47(2):369-392.
- 568 43. Braveman PA, Cubbin C, Egerter S, et al. Socioeconomic status in health research: one size  
569 does not fit all. *Jama.* 2005;294(22):2879-2888.
- 570 44. Zulfiqar T, Strazdins L, Banwell C, Dinh H, D'Este C. Growing up in Australia: paradox of  
571 overweight/obesity in children of immigrants from low-and-middle -income countries. *Obes*  
572 *Sci Pract.* 2018;4(2):178-187.
- 573 45. Vishnu A, Belbin GM, Wojcik GL, et al. The role of country of birth, and genetic and self-  
574 identified ancestry, in obesity susceptibility among African and Hispanic Americans. *Am J Clin*  
575 *Nutr.* 2019;110(1):16-23.
- 576 46. Wheaton N, Millar L, Allender S, Nichols M. The stability of weight status through the early  
577 to middle childhood years in Australia: a longitudinal study. *BMJ open.* 2015;5(4):e006963.
- 578 47. Millar L, Rowland B, Nichols M, et al. Relationship between raised BMI and sugar sweetened  
579 beverage and high fat food consumption among children. *Obesity (Silver Spring, Md).*  
580 2014;22(5):E96-103.
- 581 48. Ng SP, Korda R, Clements M, et al. Validity of self-reported height and weight and derived  
582 body mass index in middle-aged and elderly individuals in Australia. *Australian and New*  
583 *Zealand journal of public health.* 2011;35(6):557-563.

584

585

586

587  
588  
589  
590  
591  
592  
593  
594  
595



Effect of parents' country of birth on the relationship between socioeconomic status and childhood overweight and obesity in Southwest Sydney, Australia: learnings from the Growing Healthy Kids population prevalence survey

Figures

Figure 1: Directed acyclic graph of the relationship between socioeconomic status and body mass index.

medRxiv preprint doi: <https://doi.org/10.1101/2024.07.02.24309842>; this version posted July 3, 2024. The copyright holder for this preprint (which was not certified by peer review) is the author/funder, who has granted medRxiv a license to display the preprint in perpetuity. It is made available under a [CC-BY 4.0 International license](https://creativecommons.org/licenses/by/4.0/).

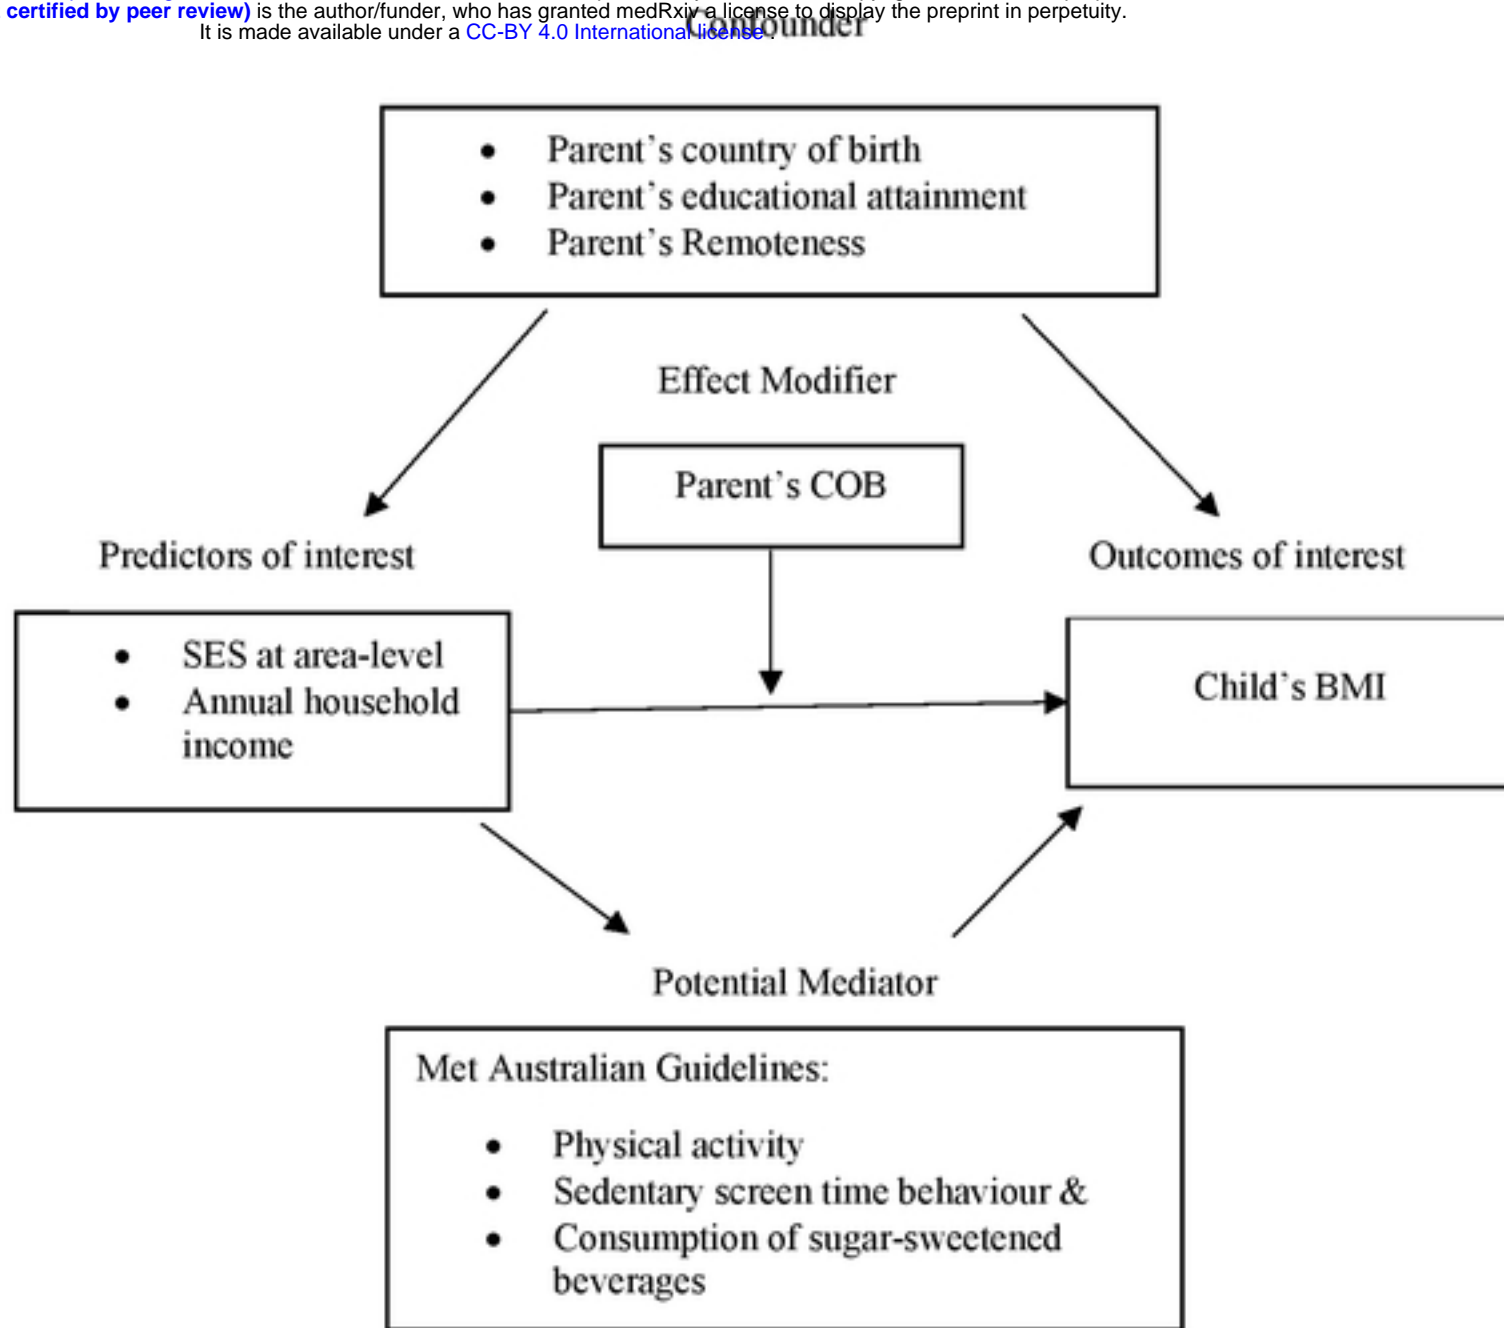

COB: Country of Birth, BMI: Body Mass Index, SSB=Sweet beverages

Figure 2: Association between IRSD, annual gross household income and BMI by parent's country of birth after adjusting for confounders<sup>1</sup>, adjusted OR 95% CI

medRxiv preprint doi: <https://doi.org/10.1101/2024.07.02.24309842>; this version posted July 3, 2024. The copyright holder for this preprint (which was not certified by peer review) is the author/funder, who has granted medRxiv a license to display the preprint in perpetuity. It is made available under a [CC-BY 4.0 International license](https://creativecommons.org/licenses/by/4.0/).

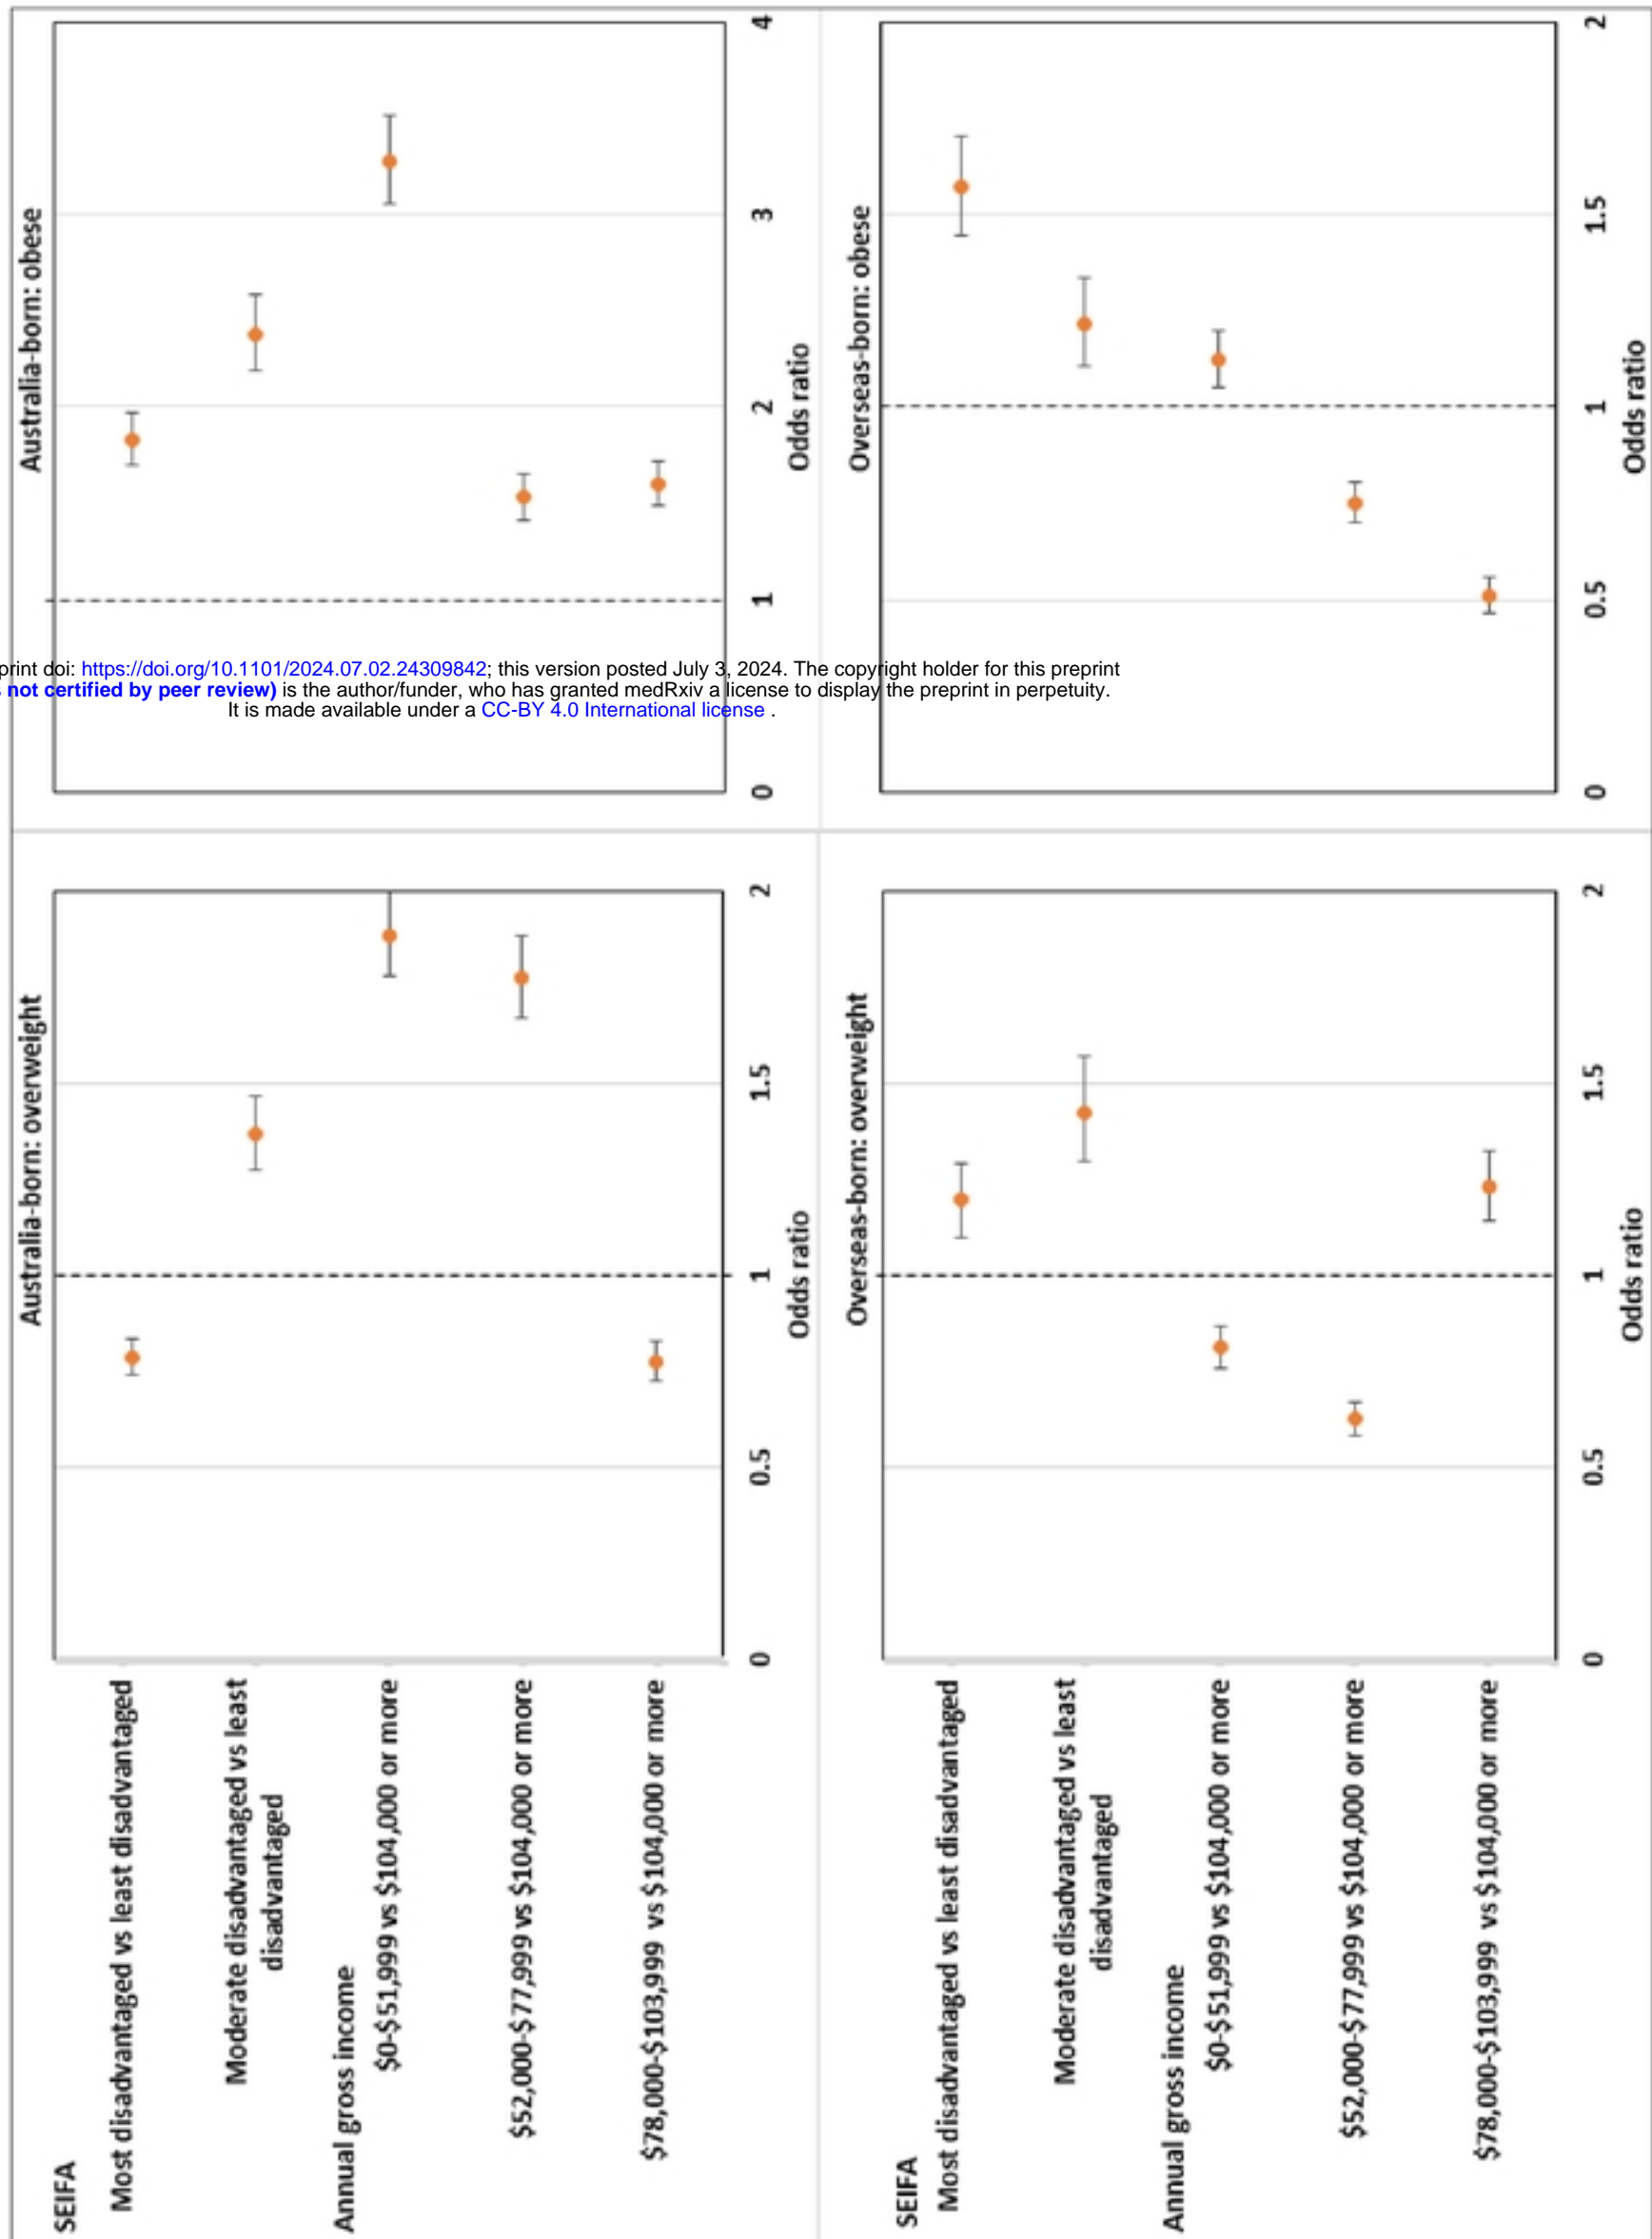

<sup>1</sup> Age, sex, parent's relationship with child (mother or father) and educational attainment, geographical location, sugar sweetened beverages consumption, whether met physical activity guideline, whether met sedentary behaviour guideline were included as covariates
